# Supplementary material for: Exploring the Perceptions of mHealth Interventions for the Prevention of Common Mental Disorders in University Students in Singapore: Qualitative Study
Source: PubMed Central journal article supplement (PMC10131767; doi:10.2196/44542), 2023-03-20
Supplement: jmir_v25i1e44542_app5.pdf [file jmir_v25i1e44542_app5.pdf]

## Supplementary material 1: The consolidated criteria for reporting qualitative research (CORE-Q)

### COREQ 32-item checklist

| No                                             | Item                                     | Guide questions/ description                                                                                                                     | Response/Reported on page (#)                                                                                                                                                                                               |
|------------------------------------------------|------------------------------------------|--------------------------------------------------------------------------------------------------------------------------------------------------|-----------------------------------------------------------------------------------------------------------------------------------------------------------------------------------------------------------------------------|
| <b>Domain 1: Research team and reflexivity</b> |                                          |                                                                                                                                                  |                                                                                                                                                                                                                             |
| Personal Characteristics                       |                                          |                                                                                                                                                  |                                                                                                                                                                                                                             |
| 1.                                             | Interviewer/facilitator                  | Which author/s conducted the interview or focus group?                                                                                           | Focus groups were conducted by external facilitators. Interviews were conducted by three authors: AS, AA, AIJ (Page 7).                                                                                                     |
| 2.                                             | Credentials                              | What were the researcher's credentials? <i>E.g. PhD, MD</i>                                                                                      | AS had a PhD, AA and AIJ had a MSc, and XL had a BA (Page 1).                                                                                                                                                               |
| 3.                                             | Occupation                               | What was their occupation at the time of the study?                                                                                              | AS was a postdoctoral researcher, AA was a PhD researcher, and AIJ and XL were research assistants (Page 1).                                                                                                                |
| 4.                                             | Gender                                   | Was the researcher male or female?                                                                                                               | AS, AA, and XL were female. AIJ was male.                                                                                                                                                                                   |
| 5.                                             | Experience and training                  | What experience or training did the researcher have?                                                                                             | AS and AIJ had experience in carrying out qualitative research. (Page 9)<br>AA and AIJ had been trained to conduct interviews. (Page 9)                                                                                     |
| Relationship with participants                 |                                          |                                                                                                                                                  |                                                                                                                                                                                                                             |
| 6.                                             | Relationship established                 | Was a relationship established prior to study commencement?                                                                                      | Some experts were known contacts of AS, AA, and LTC (Page 6).                                                                                                                                                               |
| 7.                                             | Participant knowledge of the interviewer | What did the participants know about the researcher? <i>e.g. personal goals, reasons for doing the research</i>                                  | Name, occupation, reasons for doing the research were detailed in the informed consent (Page 6)                                                                                                                             |
| 8.                                             | Interviewer characteristics              | What characteristics were reported about the interviewer/facilitator? <i>e.g. Bias, assumptions, reasons and interests in the research topic</i> | Name, occupation, reasons for doing the research for the researchers were detailed in the informed consent (Page 6). The facilitators verbally explained their relationship to the project during the introduction phase of |

| No                            | Item                                  | Guide questions/ description                                                                                                                                    | Response/Reported on page (#)                                                                                                                        |
|-------------------------------|---------------------------------------|-----------------------------------------------------------------------------------------------------------------------------------------------------------------|------------------------------------------------------------------------------------------------------------------------------------------------------|
|                               |                                       |                                                                                                                                                                 | the FGD (Page 7)                                                                                                                                     |
| <b>Domain 2: study design</b> |                                       |                                                                                                                                                                 |                                                                                                                                                      |
| Theoretical framework         |                                       |                                                                                                                                                                 |                                                                                                                                                      |
| 9.                            | Methodological orientation and Theory | What methodological orientation was stated to underpin the study? <i>e.g. grounded theory, discourse analysis, ethnography, phenomenology, content analysis</i> | Thematic analysis approach (Page 7-8).                                                                                                               |
| Participant selection         |                                       |                                                                                                                                                                 |                                                                                                                                                      |
| 10.                           | Sampling                              | How were participants selected? <i>e.g. purposive, convenience, consecutive, snowball</i>                                                                       | Convenience sampling, snowball sampling, and purposive sampling (Page 6).                                                                            |
| 11.                           | Method of approach                    | How were participants approached? <i>e.g. face-to-face, telephone, mail, email</i>                                                                              | Email and via social media (Page 6).                                                                                                                 |
| 12.                           | Sample size                           | How many participants were in the study?                                                                                                                        | 30 university students in the focus groups, 11 mental health supporters for the interviews (Page 11-12).                                             |
| 13.                           | Non-participation                     | How many people refused to participate or dropped out? Reasons?                                                                                                 | NA. Participants opt-in for the FGDs/interviews                                                                                                      |
| Setting                       |                                       |                                                                                                                                                                 |                                                                                                                                                      |
| 14.                           | Setting of data collection            | Where was the data collected? <i>e.g. home, clinic, workplace</i>                                                                                               | Focus groups and interviews took place online via Zoom, a videoconferencing platform (Page 6).                                                       |
| 15.                           | Presence of non-participants          | Was anyone else present besides the participants and researchers?                                                                                               | External moderators were there for the FGDs (Page 7).                                                                                                |
| 16.                           | Description of sample                 | What are the important characteristics of the sample? <i>e.g. demographic data, date</i>                                                                        | University undergraduate students and experts with at least one years' experience working with young adults with depression or anxiety (Page 10-11). |

| No                                     | Item                           | Guide questions/ description                                                  | Response/Reported on page (#)                                            |
|----------------------------------------|--------------------------------|-------------------------------------------------------------------------------|--------------------------------------------------------------------------|
| Data collection                        |                                |                                                                               |                                                                          |
| 17.                                    | Interview guide                | Were questions, prompts, guides provided by the authors? Was it pilot tested? | Yes. Yes. (Appendix 4 and 5).                                            |
| 18.                                    | Repeat interviews              | Were repeat interviews carried out? If yes, how many?                         | No.                                                                      |
| 19.                                    | Audio/visual recording         | Did the research use audio or visual recording to collect the data?           | Audio recording (Page 7).                                                |
| 20.                                    | Field notes                    | Were field notes made during and/or after the interview or focus group?       | Yes. During. (Page 7).                                                   |
| 21.                                    | Duration                       | What was the duration of the interviews or focus group?                       | Focus groups were 90 minutes and interviews were 45-60 minutes (Page 7). |
| 22.                                    | Data saturation                | Was data saturation discussed?                                                | Yes. (Page 7)                                                            |
| 23.                                    | Transcripts returned           | Were transcripts returned to participants for comment and/or correction?      | No.                                                                      |
| <b>Domain 3: analysis and findings</b> |                                |                                                                               |                                                                          |
| Data analysis                          |                                |                                                                               |                                                                          |
| 24.                                    | Number of data coders          | How many data coders coded the data?                                          | Two (AI and XL) (Page 7-9).                                              |
| 25.                                    | Description of the coding tree | Did authors provide a description of the coding tree?                         | Yes (Pages 7-10).                                                        |
| 26.                                    | Derivation of themes           | Were themes identified in advance or derived from the data?                   | Themes were derived from both methods (Page 7-10).                       |
| 27.                                    | Software                       | What software, if applicable, was used to manage the data?                    | ATLAS.ti V9 (Page 7).                                                    |
| 28.                                    | Participant checking           | Did participants provide feedback on the findings?                            | No (page 10)                                                             |

| No        | Item                         | Guide questions/ description                                                                                                             | Response/Reported on page (#)     |
|-----------|------------------------------|------------------------------------------------------------------------------------------------------------------------------------------|-----------------------------------|
| Reporting |                              |                                                                                                                                          |                                   |
| 29.       | Quotations presented         | Were participant quotations presented to illustrate the themes / findings? Was each quotation identified? e.g. <i>participant number</i> | Yes. Yes. (Multimedia Appendix 6) |
| 30.       | Data and findings consistent | Was there consistency between the data presented and the findings?                                                                       | Yes (Pages 12-20).                |
| 31.       | Clarity of major themes      | Were major themes clearly presented in the findings?                                                                                     | Yes (Pages 12-20).                |
| 32.       | Clarity of minor themes      | Is there a description of diverse cases or discussion of minor themes?                                                                   | Yes (Pages 12-20).                |

The COREQ aims to support the transparency of all aspects of qualitative research by providing clear standards for reporting qualitative research. The rationale should briefly discuss the justification for choosing that theory, approach, method, or technique rather than other options available, the assumptions and limitations implicit in those choices, and how those choices influence study conclusions and transferability.

Reference:

1. Booth, Andrew, Karin Hannes, Angela Harden, Jane Noyes, and Janet Harris. "COREQ (consolidated criteria for reporting qualitative studies)." (2014): 1-320.
